# Supplementary material
Source: publisher figshare collection journal article supplement (https://acs.figshare.com/ndownloader/files/4712788)

Supporting Information for World Wide Web Edition

Figure S1. Lack of a 5'-terminal triphosphate group is not responsible for the stronger binding of G to the L-16 *ScaI* ribozyme. (A) The dependence of the reaction of E•S on G concentration for the L-21 *ScaI* (●), L-21 *ScaI*<sup>OH</sup> (○), or L-16 *ScaI* (■) ribozymes. Non-linear least square fitting to a single binding site model yielded binding constants of 94, 87 and 34  $\mu\text{M}$ , respectively. Data were obtained at pH 7.2 with 10 mM  $\text{MgCl}_2$  as described in the Materials and Methods, and rate constants were normalized for comparison. (B) Dissociation of CCUCdT from the L-16 *ScaI* (●) and the L-21 *ScaI*<sup>OH</sup> (○) ribozymes in native gel pulse-chase experiments. Non-linear least square fitting yielded dissociation rate constants of  $0.023 \text{ min}^{-1}$  and  $0.00088 \text{ min}^{-1}$ , respectively. Data were obtained at 10 mM  $\text{MgCl}_2$ , pH 6.0 as described in the Materials and Methods. Note that the small burst for dissociation from the L-16 *ScaI* ribozyme presumably represents dissociation from a truncated molecule.

**Table S1: Dissociation Rate Constants of Different Substrates at 50 and 30 °C**

| Substrates     | 50 °C                                 |                     | 30 °C                                 |                     |
|----------------|---------------------------------------|---------------------|---------------------------------------|---------------------|
|                | $k_{\text{off}}$ (min <sup>-1</sup> ) | $k_{\text{rel}}$    | $k_{\text{off}}$ (min <sup>-1</sup> ) | $k_{\text{rel}}$    |
| (C)CCUCdTA     | 6.0                                   | (1)                 | 1.9 <sup>a</sup>                      | (1)                 |
| (C)CCUCdTAAACC | $1.6 \cdot 10^{-3}$                   | $3.4 \cdot 10^{-4}$ | $2.5 \cdot 10^{-4}$ <sup>a</sup>      | $1.5 \cdot 10^{-4}$ |
| (C)CCUCdTAAAAA | 0.58                                  | 0.1                 | 0.091 <sup>a</sup>                    | 0.05                |

Dissociation constants of full-length or  $-6C^{\Delta}$  substrates (Chart 1) from the E•S complex were determined at pH 6.0 and 50 °C or 30 °C, respectively, as described in the Materials and Methods and Table 1. Values are averages of two or more measurements. <sup>a</sup> Data from Table 1 are included for comparison.

# Figure S1

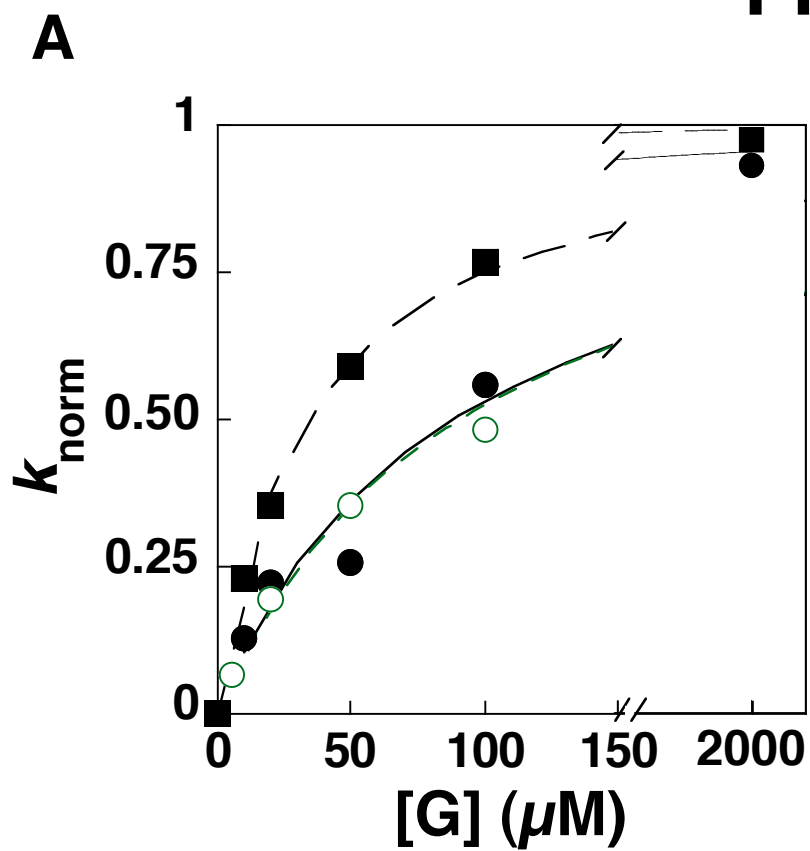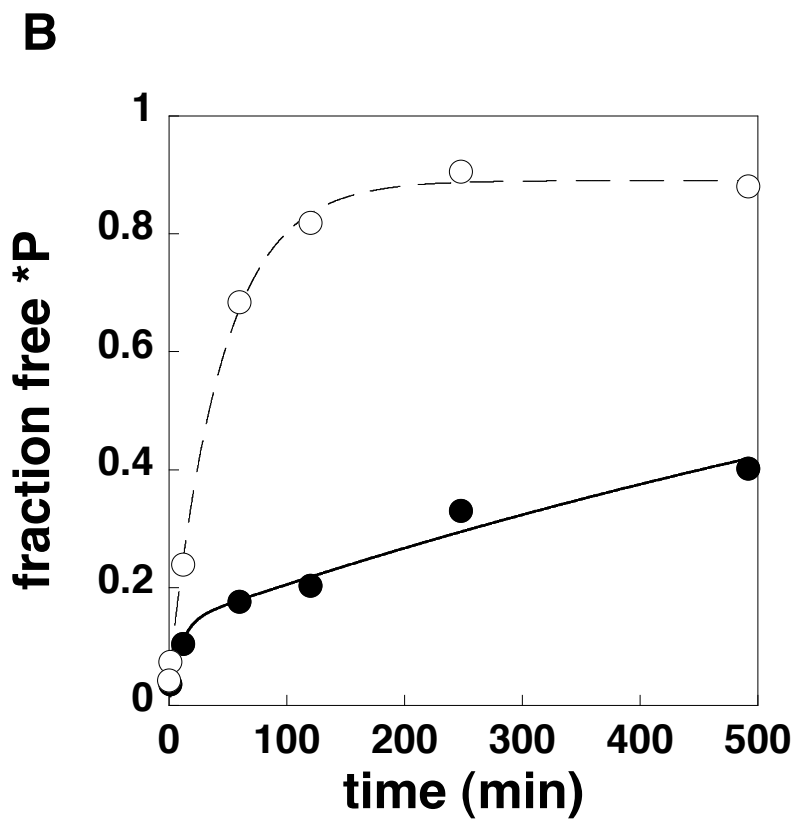

Supplement: Supplementary file 1 [file 4712788]
